# Supplementary material for: A dual enzyme-mimicking radical generator for enhanced photodynamic therapyviaseries–parallel catalysis
Source: Royal Society of Chemistry journal article supplement (doi:10.1039/d1nr04104e), 2021-01-01
Supplement: d1nr04104e1.pdf [file d1nr04104e1.pdf]

## Supporting Information

### Dual Enzyme-Mimicking Radical Generator for Enhanced Photodynamic Therapy via Series-Parallel Catalysis

Zhenbang Cao<sup>a, b, ‡</sup>, Liang Zhang<sup>c, ‡</sup>, Jianxin Liu<sup>d</sup>, Dong Wang<sup>c, \*</sup>, Kang Liang<sup>a, b, e</sup>, Yu Chen<sup>f</sup>,

Zi Gu<sup>a, b, \*</sup>

<sup>a</sup> School of Chemical Engineering, University of New South Wales, Sydney, NSW 2052,

Australia

<sup>b</sup> Australian Centre for NanoMedicine (ACN), University of New South Wales, Sydney, NSW

2052, Australia

<sup>c</sup> Department of Ultrasound, The First Affiliated Hospital of Chongqing Medical University,

Chongqing 400010, P.R.China

<sup>d</sup> Ultrasound Department, The Central Hospital of Wuhan, Tongji Medical College,

Huazhong University of Science and Technology, Wuhan, Hubei 430014, P.R.China

<sup>e</sup> Graduate School of Biomedical Engineering, University of New South Wales, Sydney, NSW

2052, Australia

<sup>f</sup> School of Life Sciences, Shanghai University, Shanghai 200444, P.R.China

<sup>†</sup> E-mails: wang57554@163.com, zi.gu1@unsw.edu.au

<sup>‡</sup> Authors Zhenbang Cao and Liang Zhang contributed equally to this work.

**Table S1** Size summary of PEG/MOF in various media.

| PEG-MnMOF74            | Size (nm) | PDI  |
|------------------------|-----------|------|
| In water               | 175.7     | 0.08 |
| In saline              | 171.0     | 0.13 |
| In cell culture medium | 173.0     | 0.13 |
| In PBS                 | 239.7     | 0.13 |

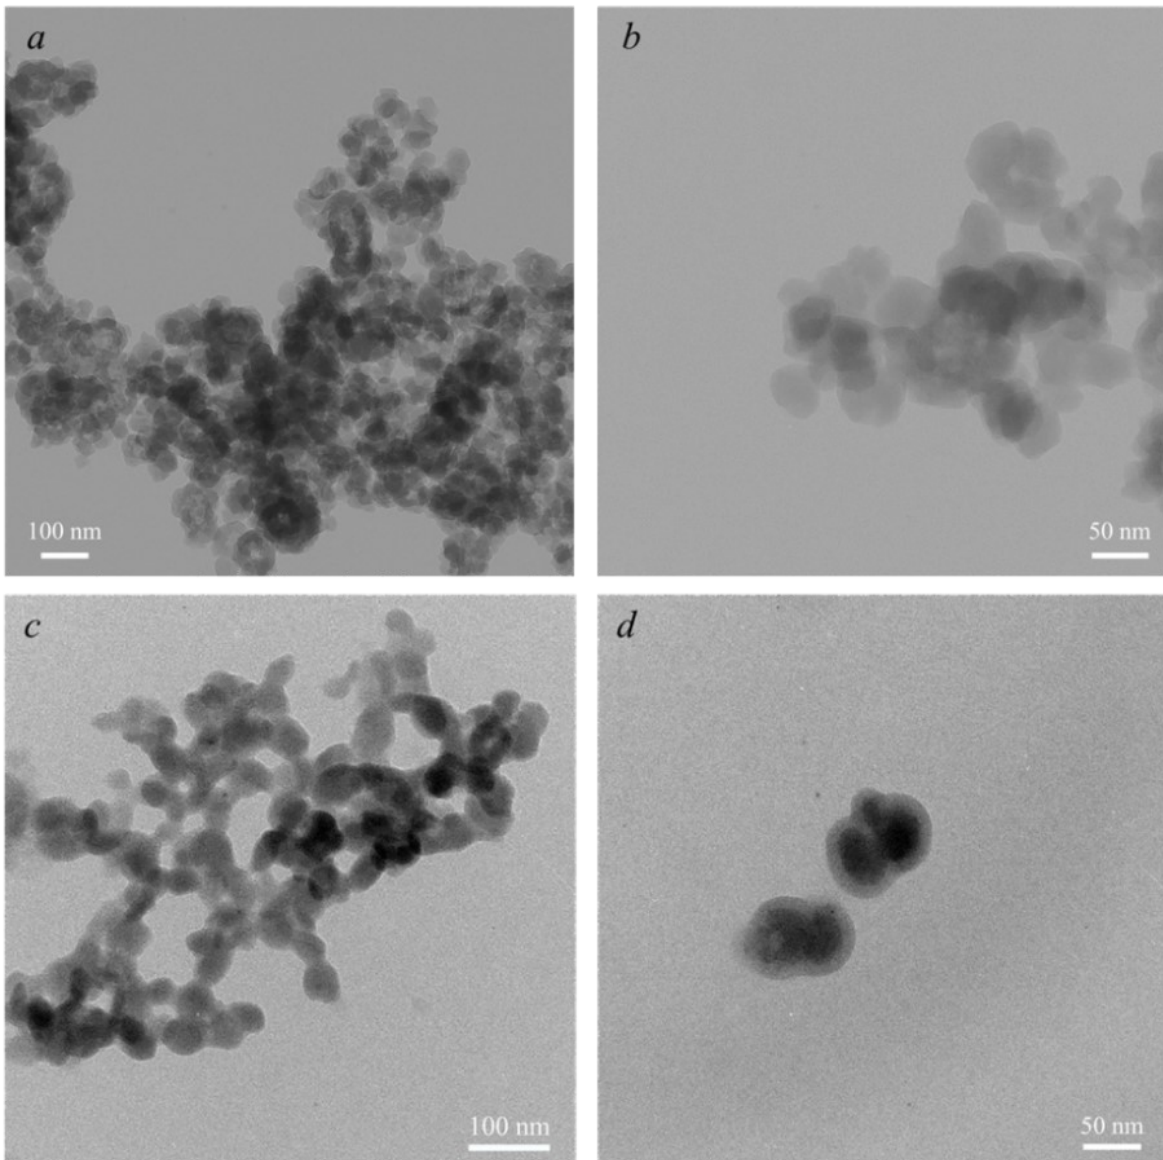

**Figure S1** TEM images of (a, b) MnMOF74 and (c, d) PEG-MnMOF74.

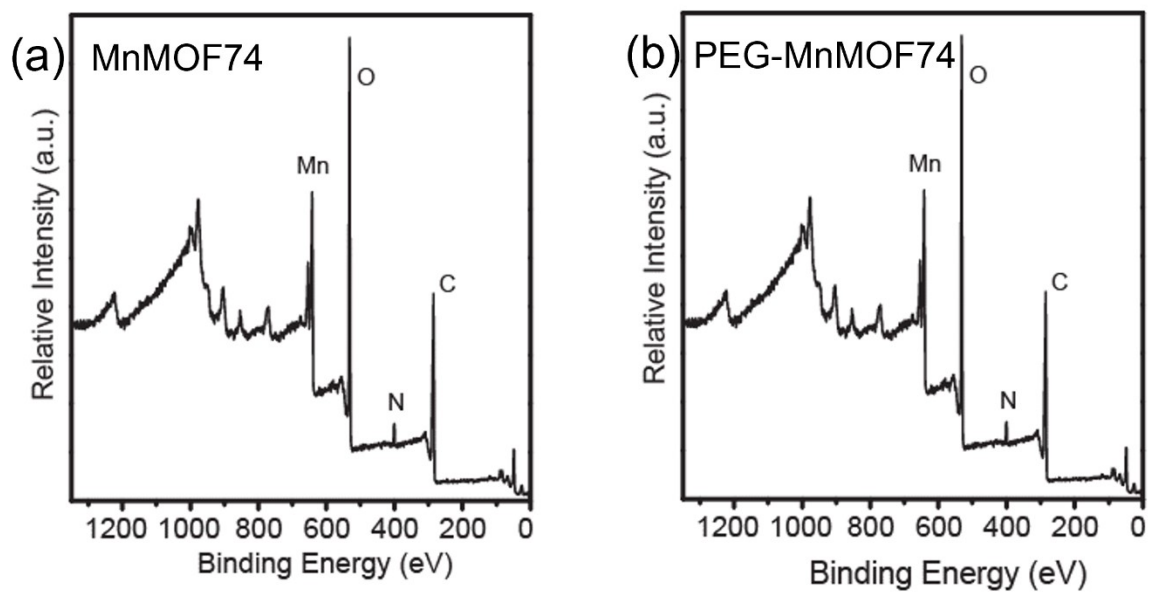

**Figure S2** XPS spectra of MnMOF74 and PEG-MnMOF74.

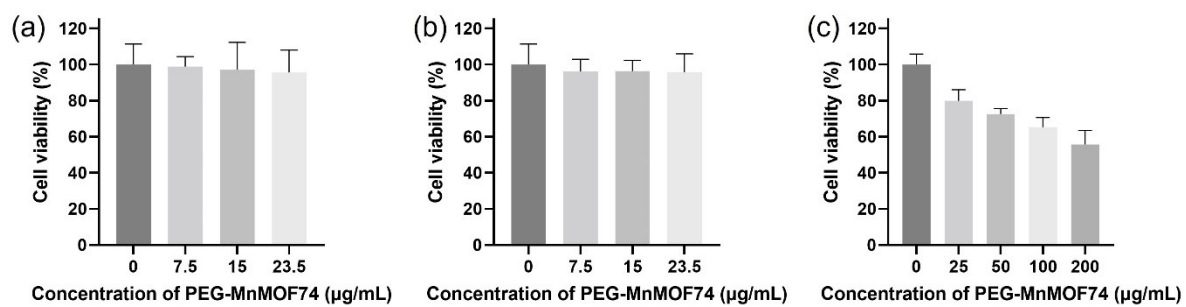

**Figure S3** Cell viability of PEG-MnMOF74 in 4T1 cell cultures with (b) and without (a, c) 808 nm laser irradiation.

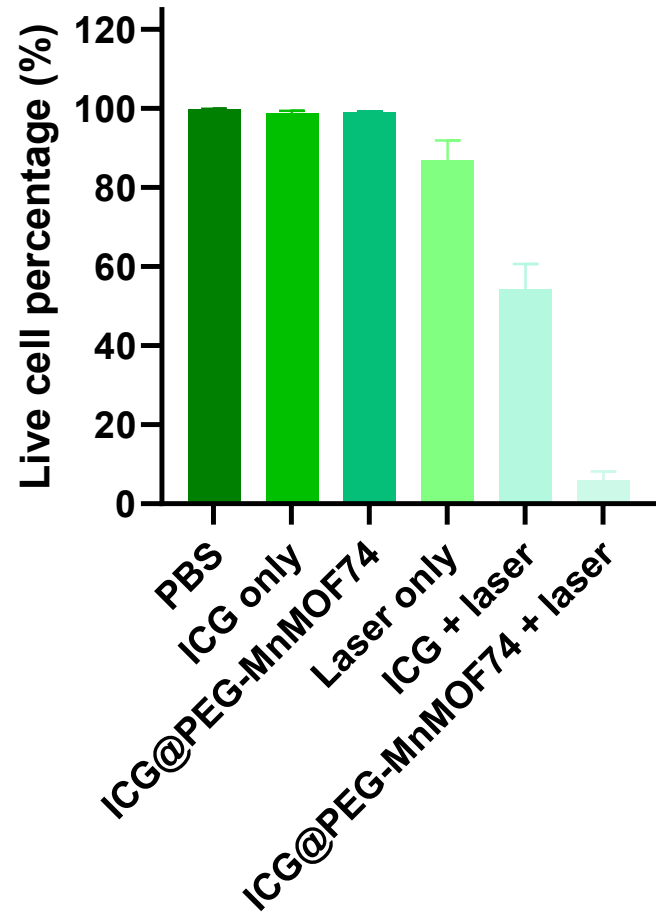

**Figure S4** Quantitative image analysis of live/dead cell staining results.

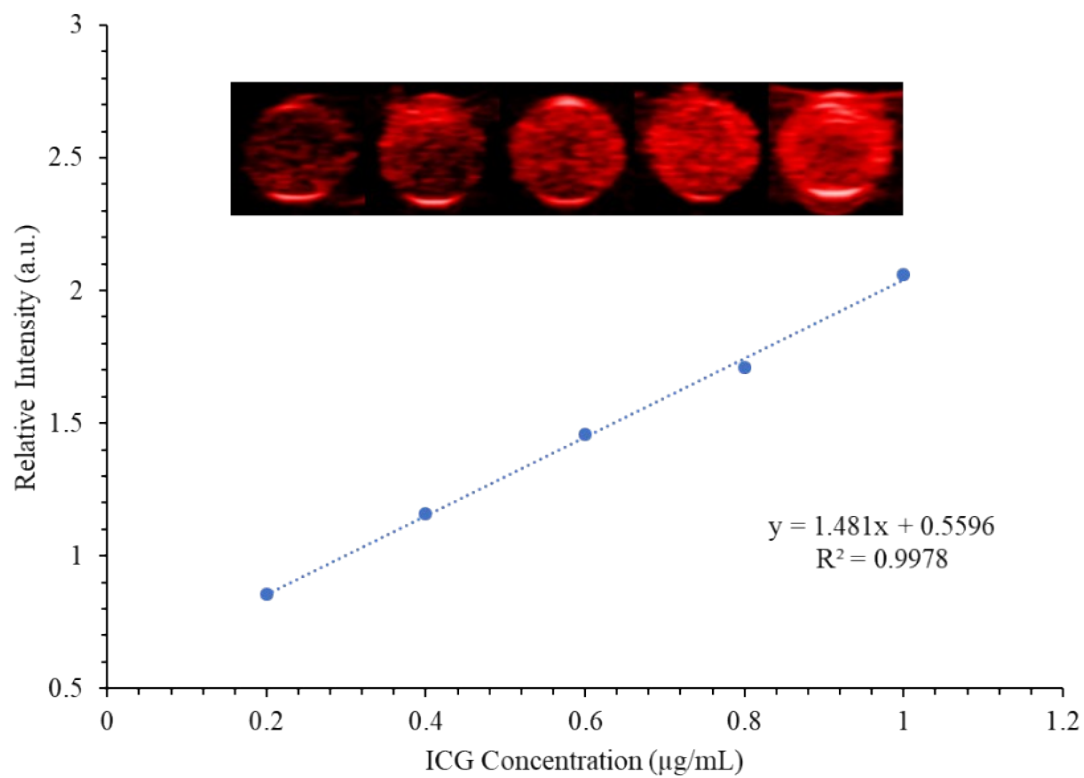

**Figure S5** In vitro PA contrast images and PA values of ICG@PEGMnMOF74 at different ICG concentrations.

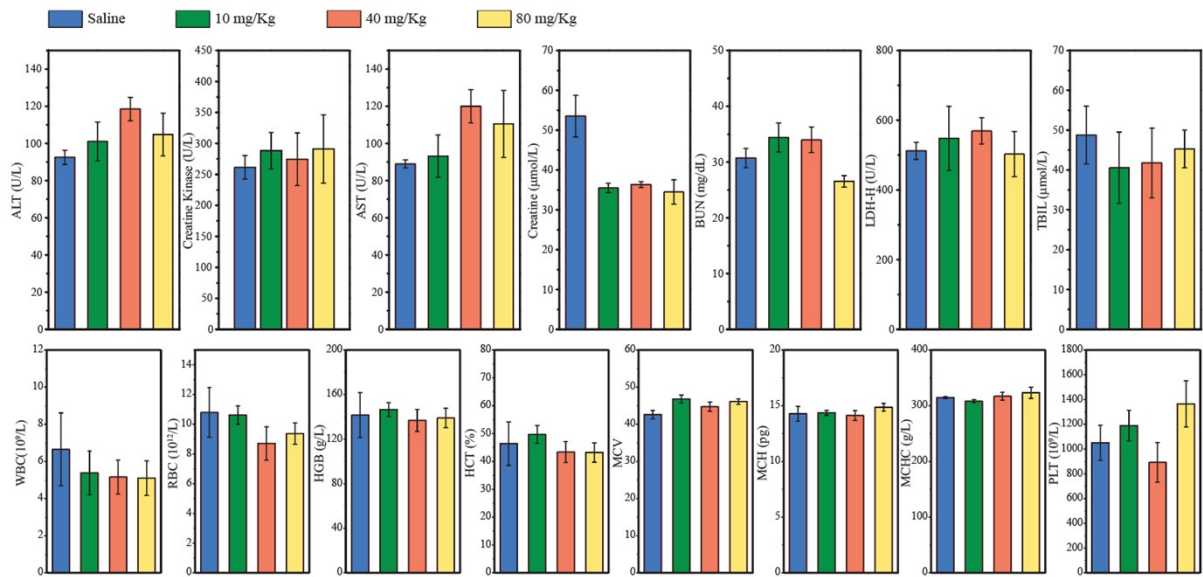

**Figure S6** Biochemical blood indexes and hematological indexes of Balb/c mice at 30 day after intravenous injection of ICG@PEG-MnMOF74 at the dosages of 10, 40 and 80 mg kg<sup>-1</sup>.
